# Supplementary material for: Prevalent and persistent new-onset autoantibodies in mild to severe COVID-19
Source: PubMed Central journal article supplement (PMC11484904; doi:10.1038/s41467-024-53356-5), 2024-10-17
Supplement: 41467_2024_53356_MOESM2_ESM.pdf [file 41467_2024_53356_MOESM2_ESM.pdf]

## **Description of Additional Supplementary Files**

Supplementary Data 1 | Protein antigens for analysis of the new-onset autoantibody repertoire.

Supplementary Data 2 | Amino acid sequences of the 22 most prevalent new-onset autoantibodies.

Supplementary Data 3 | Peptide antigens for epitope mapping.
