# Supplementary material for: Prevalent and persistent new-onset autoantibodies in mild to severe COVID-19
Source: Nat Commun. 2024 Oct 17;15:8941. doi: 10.1038/s41467-024-53356-5 (PMC11484904; doi:10.1038/s41467-024-53356-5)
Supplement: Supplementary file 1 — Supplementary Information [file 41467_2024_53356_MOESM1_ESM.pdf]

# Prevalent and persistent new-onset autoantibodies in mild to severe COVID-19

## Supplementary information

August F. Jernbom<sup>1</sup>, Lovisa Skoglund<sup>1</sup>, Elisa Pin<sup>1</sup>, Ronald Sjöberg<sup>1</sup>, Hanna Tegel<sup>2</sup>, Sophia Hober<sup>2</sup>, Elham Rostami<sup>3,4</sup>, Annica Rasmusson<sup>5</sup>, Janet L. Cunningham<sup>5</sup>, Sebastian Havervall<sup>6</sup>, Charlotte Thålin<sup>6</sup>, Anna Månberg<sup>1</sup>, Peter Nilsson<sup>1</sup>

<sup>1</sup> Division of Affinity Proteomics, Department of Protein Science, SciLifeLab, KTH Royal Institute of Technology, Stockholm, Sweden

<sup>2</sup> Division of Protein Technology, Department of Protein Science, KTH Royal Institute of Technology, Stockholm, Sweden

<sup>3</sup> Section of Neurosurgery, Department of Medical Sciences, Uppsala University Hospital, Uppsala, Sweden

<sup>4</sup> Department of Neuroscience, Karolinska Institutet, Stockholm, Sweden

<sup>5</sup> Department of Medical Sciences, Psychiatry, Uppsala University, Uppsala, Sweden

<sup>6</sup> Department of Clinical Sciences, Karolinska Institutet, Danderyd Hospital, Stockholm, Sweden

Corresponding author:

August F. Jernbom

[august.jernbom@scilifelab.se](mailto:august.jernbom@scilifelab.se)

[augustfa@kth.se](mailto:augustfa@kth.se)

## Supplementary Tables

Supplementary Table 1 | Cohort demographics.

|                                               | Discovery |                | Validation  |                  |
|-----------------------------------------------|-----------|----------------|-------------|------------------|
|                                               | HCW       | Hosp. patients | Neuro-COVID | Pre-pan-demic HC |
| <b>N individuals</b>                          | 478       | 47             | 25          | 29               |
| <b>Age [years, mean (SD)]</b>                 | 45 (11)   | 57 (13)        | 62 (16)     | 24 (6)           |
| <b>Sex [N (%)]</b>                            |           |                |             |                  |
| F                                             | 416 (87%) | 16 (34%)       | 8 (32%)     | 26 (90%)         |
| M                                             | 62 (13%)  | 31 (66%)       | 16 (64%)    | 3 (10%)          |
| Missing data                                  | 0 (0%)    | 0 (0%)         | 1 (4%)      | 0 (0%)           |
| <b>N sera</b>                                 | 2297      | 235            | 25          | 29               |
| per individual [mean (SD)]                    | 4.8 (0.5) | 5 (0)          | 1 (0)       | 1 (0)            |
| <b>N CSF</b>                                  | 0         | 0              | 21          | 23               |
| <b>Time of seroconversion [N (%)]</b>         |           |                |             |                  |
| May-20                                        | 96 (20%)  | 40 (85%)       |             |                  |
| Sep-20                                        | 109 (23%) | 7 (15%)        |             |                  |
| Jan-21                                        | 233 (49%) | 0 (0%)         |             |                  |
| May-21                                        | 40 (8%)   | 0 (0%)         |             |                  |
| <b>Self-rep. sympt. post-COVID-19 [N (%)]</b> |           |                |             |                  |
| Any                                           |           |                |             |                  |
| No                                            | 184 (38%) |                |             |                  |
| Yes                                           | 294 (62%) |                |             |                  |
| Neuropsychiatric                              |           |                |             |                  |
| Mild                                          | 29 (6%)   |                |             |                  |
| Moderate                                      | 83 (17%)  |                |             |                  |
| Severe                                        | 25 (5%)   |                |             |                  |
| None                                          | 341 (71%) |                |             |                  |
| <b>Respiratory support [N (%)]</b>            |           |                |             |                  |
| None                                          |           | 17 (36%)       | 12 (48%)    |                  |
| Oxygen on nasal cannula or mask               |           | 25 (54%)       | 5 (20%)     |                  |
| Noninvasive respiratory support               |           | 2 (4%)         | 1 (4%)      |                  |
| Intubation                                    |           | 3 (6%)         | 5 (20%)     |                  |
| Missing data                                  |           | 0 (0%)         | 2 (8%)      |                  |
| <b>30-day mortality</b>                       |           | 0              | 0           |                  |
| <b>New-onset neurological manifestations</b>  |           | 0 (0%)         | 25 (100%)   |                  |
| <b>Preexisting comorbidities</b>              |           |                |             |                  |
| Diabetes                                      |           | 8 (17%)        | 4 (16%)     |                  |
| Hypertension                                  |           | 17 (36%)       | 10 (40%)    |                  |
| Cardiovascular disease                        |           | 4 (9%)         | 6 (24%)     |                  |
| Cerebrovascular disease                       |           | 3 (6%)         | 1 (4%)      |                  |
| Chronic lung disease                          |           | 1 (2%)         | 2 (8%)      |                  |
| Asthma                                        |           | 11 (23%)       | 1 (4%)      |                  |
| Chronic kidney disease                        |           | 4 (9%)         | 1 (4%)      |                  |
| Active cancer                                 |           | 0 (0%)         | 0 (0%)      |                  |
| Neurologic disease                            |           | 2 (4%)         | 0 (0%)      |                  |
| Missing data                                  |           | 1 (2%)         | 2 (8%)      |                  |

**Supplementary Table 2 | Groups of HCW and COVID-19 patients analyzed on planar arrays.** All samples were anti-Spike IgG positive. Preexisting comorbidities are listed in Supplementary Table 1.

| <b>HCW group</b>                           | <b>Definition</b>                                                                                                                                                                                                                         |
|--------------------------------------------|-------------------------------------------------------------------------------------------------------------------------------------------------------------------------------------------------------------------------------------------|
| Cardiopulmonary symptoms                   | Self-reported long-term symptoms >10 months post COVID-19, with ongoing cardiopulmonary symptoms defined as palpitations and shortness at breath at visit 4.                                                                              |
| Fever, fatigue, and muscle pain            | Self-reported long-term symptoms >8 months post COVID-19, with ongoing general symptoms defined as fever, fatigue, and muscle pain at visit 4.                                                                                            |
| New diagnoses after COVID-19               | Self-reported long-term symptoms >2 months post COVID-19, newly diagnosed with conditions such as postural orthostatic tachycardia syndrome, polymyalgia rheumatica, post-acute sequelae of SARS-CoV-2 infection, or hyperparathyroidism. |
| Cognitive and neurological symptoms        | Self-reported long-term symptoms >8 months post COVID-19, with ongoing cognitive and/or neurological symptoms defined as brain fatigue, memory impairment, concentration difficulties, dizziness, and headache at visit 4.                |
| Dermatological symptoms                    | Self-reported long-term symptoms >6 months post COVID-19, with ongoing moderate to severe skin problems.                                                                                                                                  |
| Anosmia or ageusia                         | Self-reported long-term symptoms >12 months post COVID-19, with ongoing severe symptoms of anosmia and ageusia.                                                                                                                           |
| Severe post-COVID-19 symptoms              | At least six moderate to severe self-reported ongoing long-term symptoms.                                                                                                                                                                 |
| Moderate COVID-19 with lasting symptoms    | Self-reported severe COVID-19 and with at least six different self-reported long-term symptoms.                                                                                                                                           |
| <b>Hospitalized COVID-19 patient group</b> |                                                                                                                                                                                                                                           |
| Critical COVID-19 (male)                   | Males without any preexisting comorbidities, where the majority received care at the intensive care unit due to COVID-19. 30-day mortality within the group was 50%.                                                                      |
| Severe COVID-19 (male)                     | Males without any preexisting comorbidities, where the majority received care at the intermediate care unit due to COVID-19. 30-day mortality within the group was 25%.                                                                   |
| Severe COVID-19 (female)                   | Females without any preexisting comorbidities, where the majority received care at the intermediate care unit due to COVID-19. 30-day mortality within the group was 25%.                                                                 |
| Severe COVID-19 with comorbidities         | 50% females. Two patients with multiple sclerosis with ongoing immunosuppressive treatment, one patient with Guillan-Barré secondary to COVID-19 and one patient with hypertension. 30-day mortality within the group was 25%.            |

**Supplementary Table 3 | Location categories of the Generic GO term subset.**

| <b>GO ID</b> | <b>Name</b>                      | <b>Annotation</b> |
|--------------|----------------------------------|-------------------|
| GO:0005576   | extracellular region             | Extracellular     |
| GO:0005615   | extracellular space              | Extracellular     |
| GO:0005929   | cilium                           | Extracellular     |
| GO:0030312   | external encapsulating structure | Extracellular     |
| GO:0031012   | extracellular matrix             | Extracellular     |
| GO:0005618   | cell wall                        | Plasma membrane   |
| GO:0005886   | plasma membrane                  | Plasma membrane   |
| GO:0000228   | nuclear chromosome               | Nuclear           |
| GO:0005634   | nucleus                          | Nuclear           |
| GO:0005635   | nuclear envelope                 | Nuclear           |
| GO:0005654   | nucleoplasm                      | Nuclear           |
| GO:0005694   | chromosome                       | Nuclear           |
| GO:0005730   | nucleolus                        | Nuclear           |
| GO:0005739   | mitochondrion                    | Intracellular     |
| GO:0005764   | lysosome                         | Intracellular     |
| GO:0005768   | endosome                         | Intracellular     |
| GO:0005773   | vacuole                          | Intracellular     |
| GO:0005777   | peroxisome                       | Intracellular     |
| GO:0005783   | endoplasmic reticulum            | Intracellular     |
| GO:0005794   | Golgi apparatus                  | Intracellular     |
| GO:0005811   | lipid droplet                    | Intracellular     |
| GO:0005815   | microtubule organizing center    | Intracellular     |
| GO:0005829   | cytosol                          | Intracellular     |
| GO:0005840   | ribosome                         | Intracellular     |
| GO:0005856   | cytoskeleton                     | Intracellular     |
| GO:0009536   | plastid                          | Intracellular     |
| GO:0009579   | thylakoid                        | Intracellular     |
| GO:0031410   | cytoplasmic vesicle              | Intracellular     |
| GO:0043226   | organelle                        | Intracellular     |

**Supplementary Table 4 | Self-reported symptoms post-COVID-19.**

Prevalence of self-reported moderate or severe symptoms among HCW. Data pertaining to Figure 3d. Self-reported mild symptoms were excluded.

| <b>Symptom<br/>post-COVID-19</b> | <b>Moderate or<br/>severe [n(%)]</b> | <b>Not present<br/>[n(%)]</b> |
|----------------------------------|--------------------------------------|-------------------------------|
| Cough                            | 46 (11)                              | 329 (82)                      |
| Diarrhea                         | 16 (4)                               | 374 (93)                      |
| Dyspnea                          | 57 (14)                              | 321 (80)                      |
| Dizziness                        | 28 (7)                               | 356 (88)                      |
| Fatigue                          | 144 (36)                             | 222 (55)                      |
| Fever                            | 24 (6)                               | 372 (92)                      |
| Hair loss                        | 37 (9)                               | 351 (87)                      |
| Headache                         | 78 (19)                              | 301 (75)                      |
| Impaired hearing                 | 14 (3)                               | 384 (95)                      |
| Ageusia                          | 117 (29)                             | 268 (67)                      |
| Bodily pain                      | 80 (20)                              | 305 (76)                      |
| Nausea                           | 18 (4)                               | 369 (92)                      |
| Numbness                         | 6 (1)                                | 379 (94)                      |
| Anosmia                          | 130 (32)                             | 253 (63)                      |
| Palpitations                     | 51 (13)                              | 332 (82)                      |
| Skin disorders                   | 16 (4)                               | 382 (95)                      |
| Sleep disturbance                | 66 (16)                              | 328 (81)                      |
| Stomach ache                     | 10 (2)                               | 386 (96)                      |

## Supplementary Figures

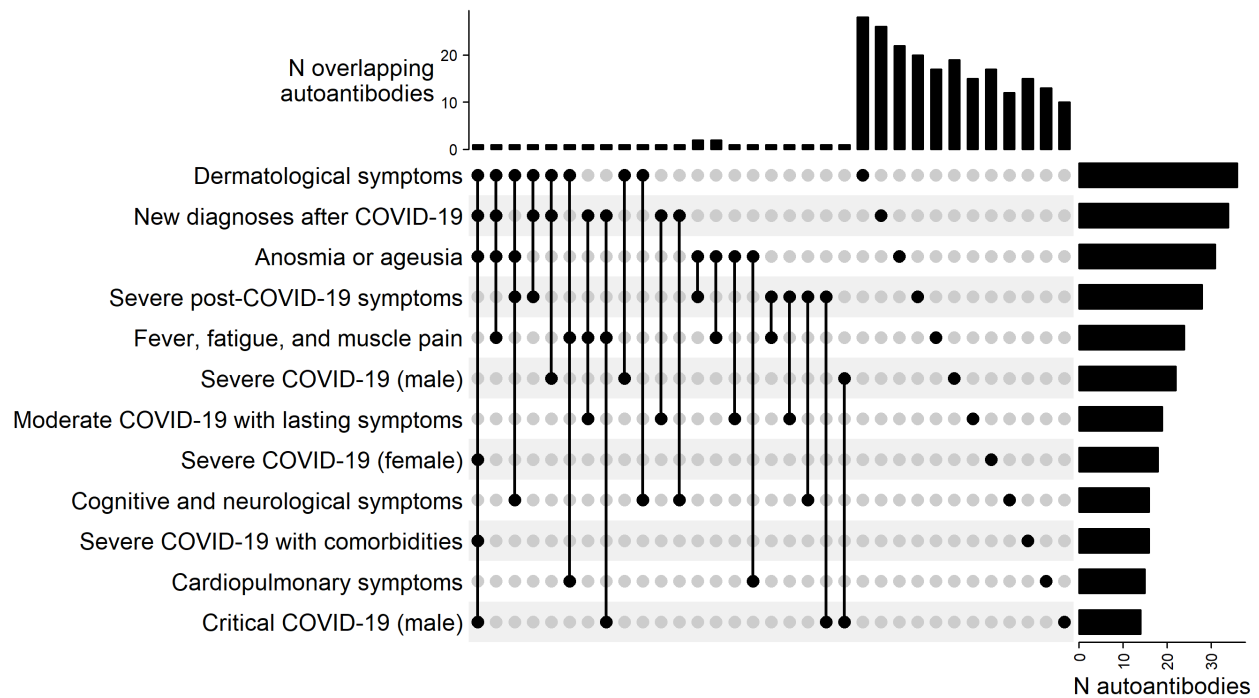

### Supplementary Figure 1 | Planar arrays reveal heterogeneous autoantibody profiles in groups of HCW and hospitalized patients.

Row bars depict the number of detected autoantibodies in each group of HCW or hospitalized patients. Interconnected points in the intersection matrix indicate set intersections, i.e., groups sharing one or more detected autoantibodies. Column bars depict the autoantibody profile intersection size, i.e., the number of autoantibodies present in single or multiple groups in accordance with the intersection matrix.

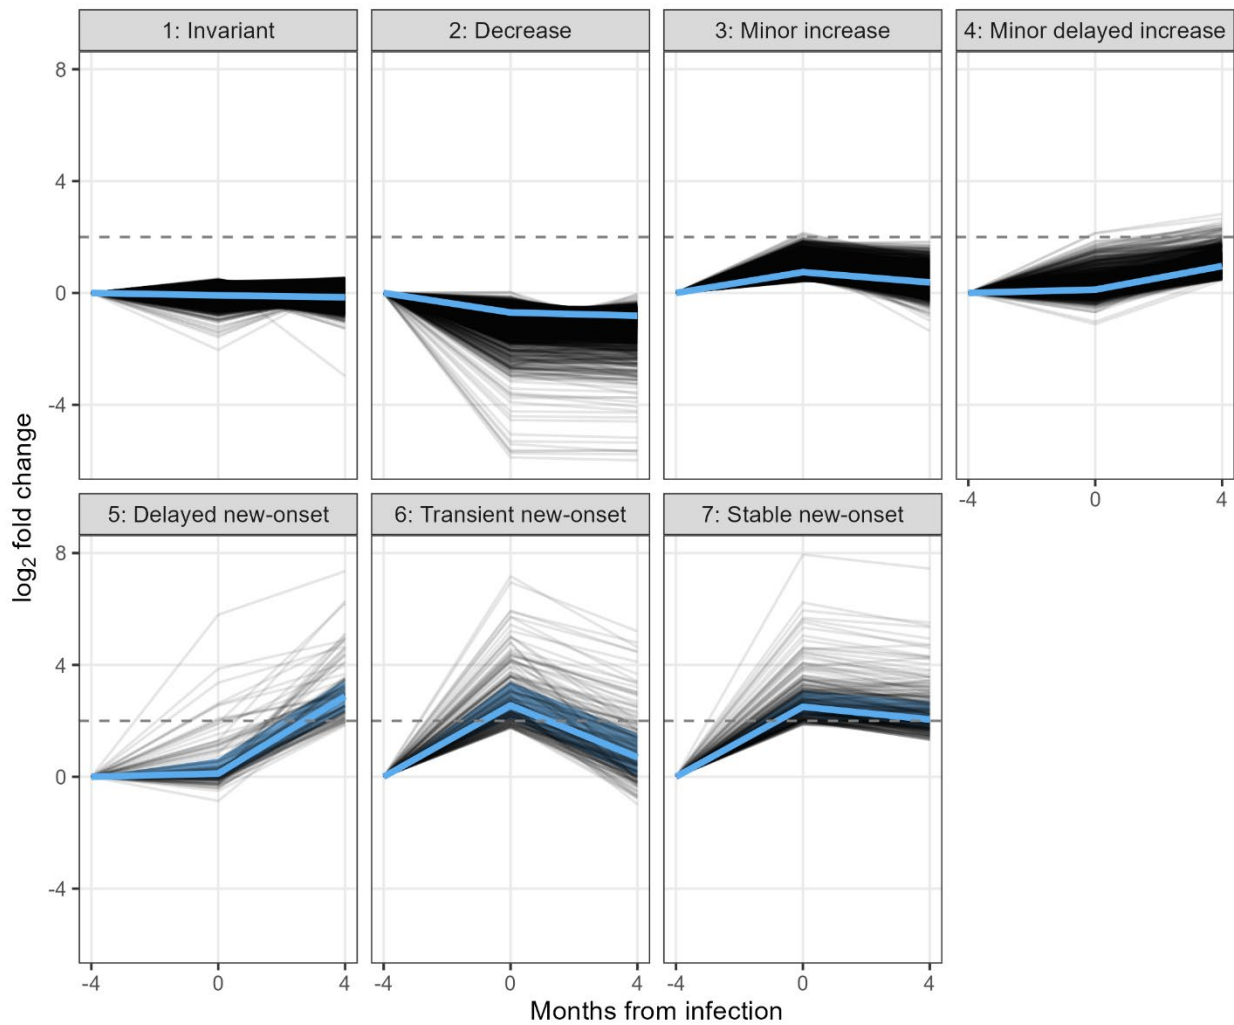

**Supplementary Figure 2 | PAM clustering stratifies autoantibody dynamics.** PAM clustering with the custom cosine  $\times$  euclidean distance metric revealed 7 clusters of autoantibody dynamics. Black lines depict autoantibody trajectories (of one autoantibody in one individual). Blue lines and shaded areas represent median and quartiles, respectively.



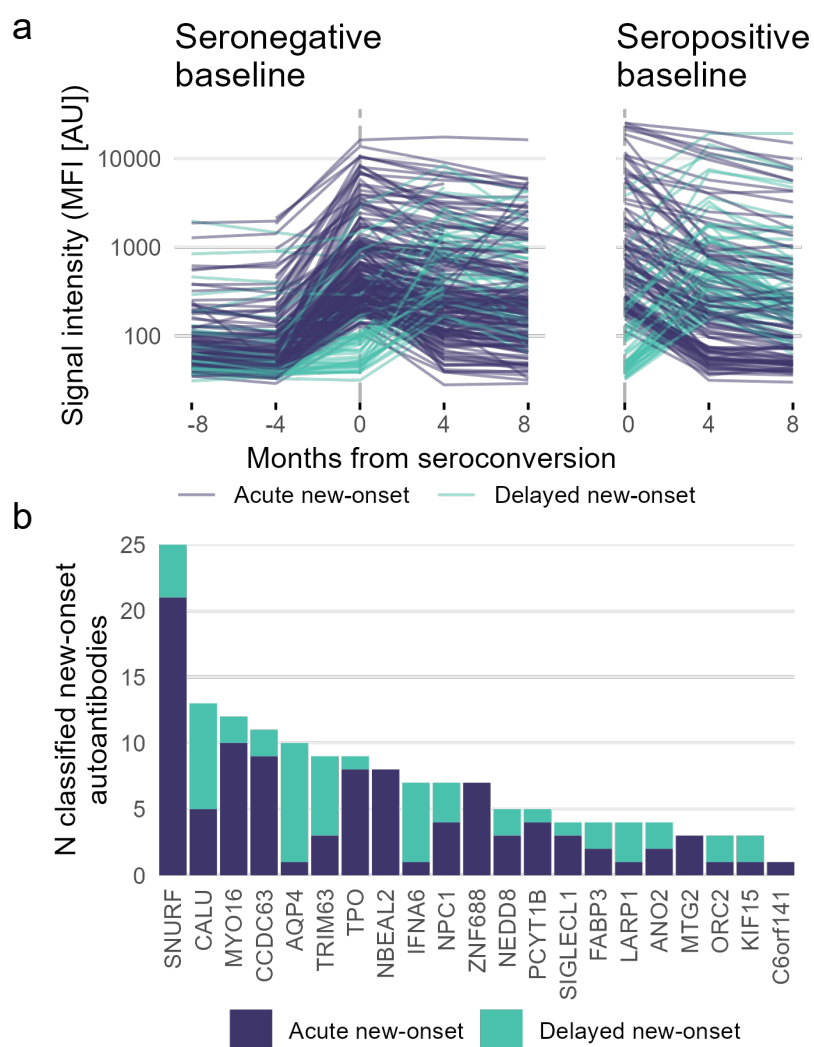

**Supplementary Figure 4 | Classification of new-onset autoantibodies in individuals without seronegative baseline sample. a** Trajectories of new-onset autoantibodies in individuals with seronegative (left) and seropositive (right) baseline sample. **b** Count of new-onset autoantibodies in individuals with seropositive baseline sample.

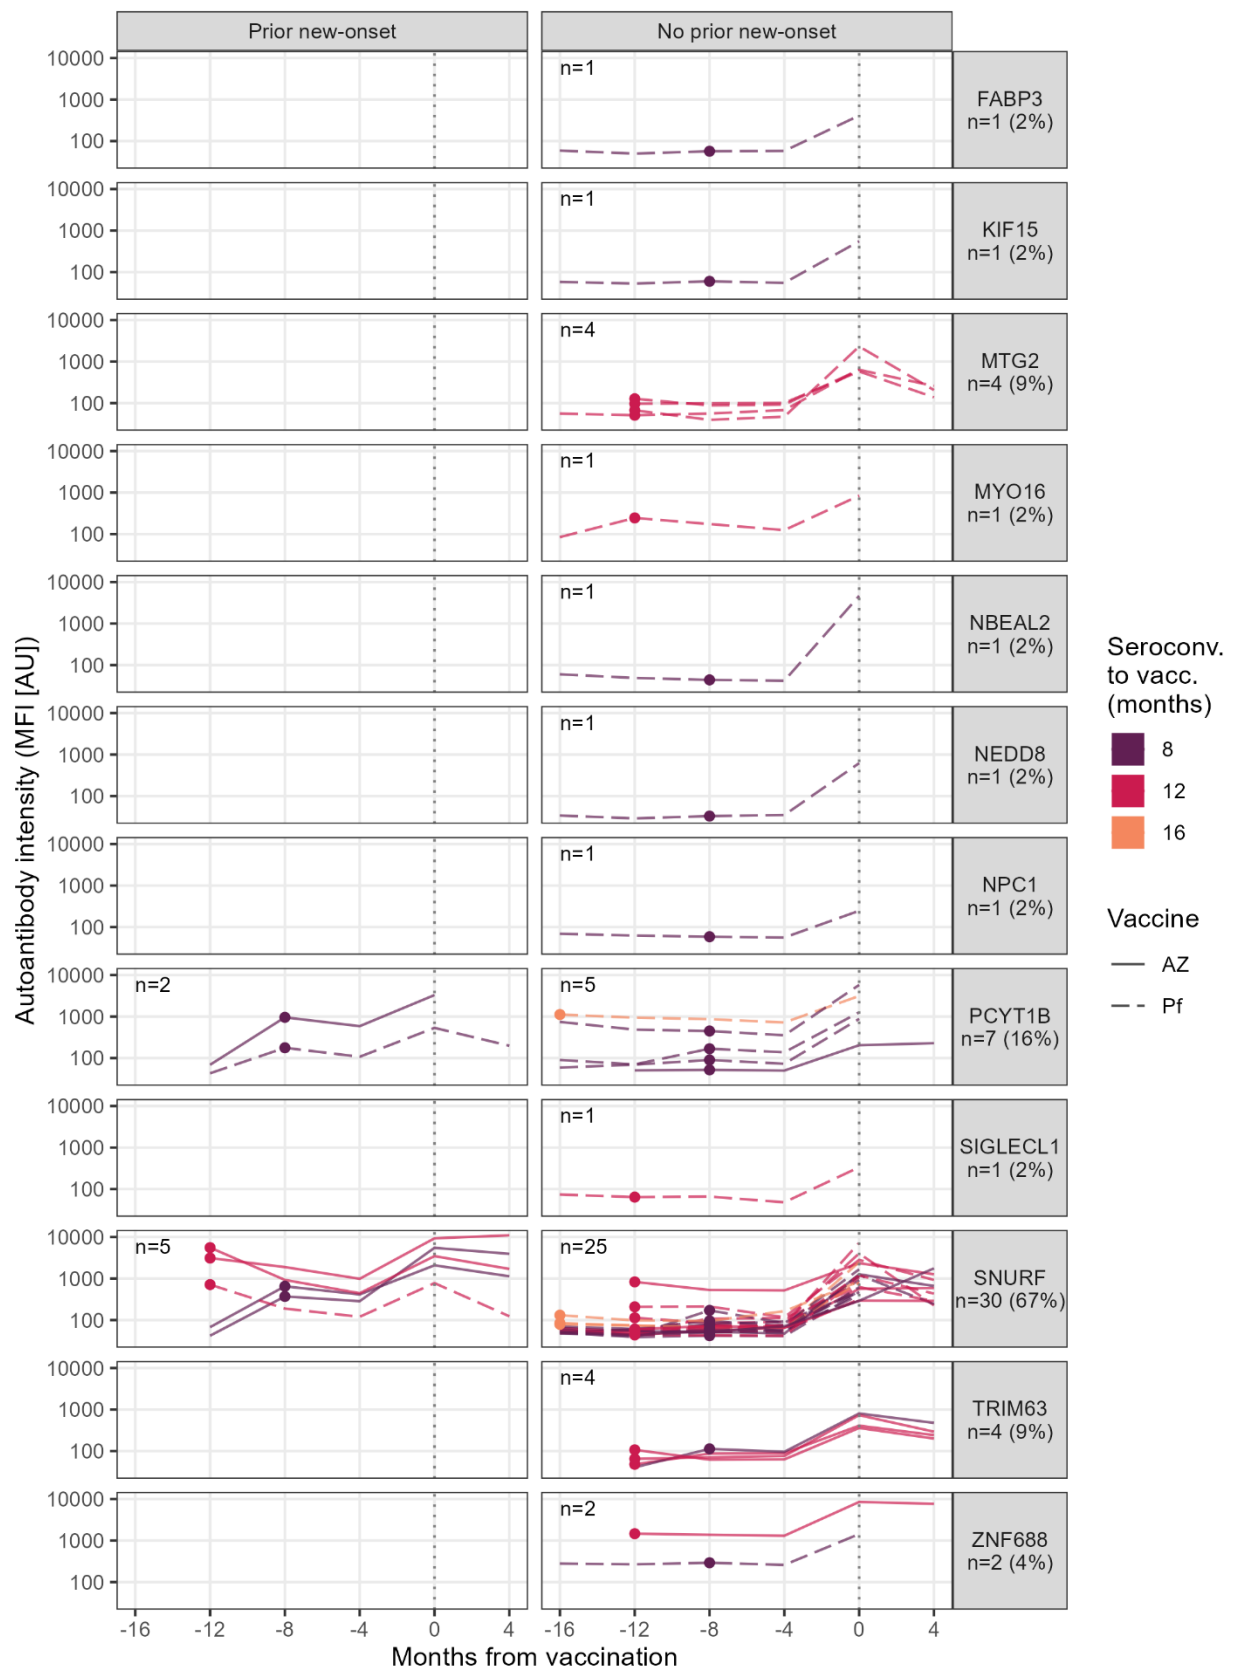

**Supplementary Figure 5 | Trajectories of new-onset autoantibodies at vaccination.** Lines depict autoantibody trajectories of individuals with a 4-fold increase of any of the 22 prevalent new-onset autoantibodies at vaccination. Points indicate time of seroconversion. Color indicates months between seroconversion and first vaccination. Individuals are separated across panel columns based on any prior new-onset autoantibody towards the corresponding antigen (panel rows) at infection. Percentages were calculated among all HCW with an autoantibody that increased at vaccination ( $n=45$ ).

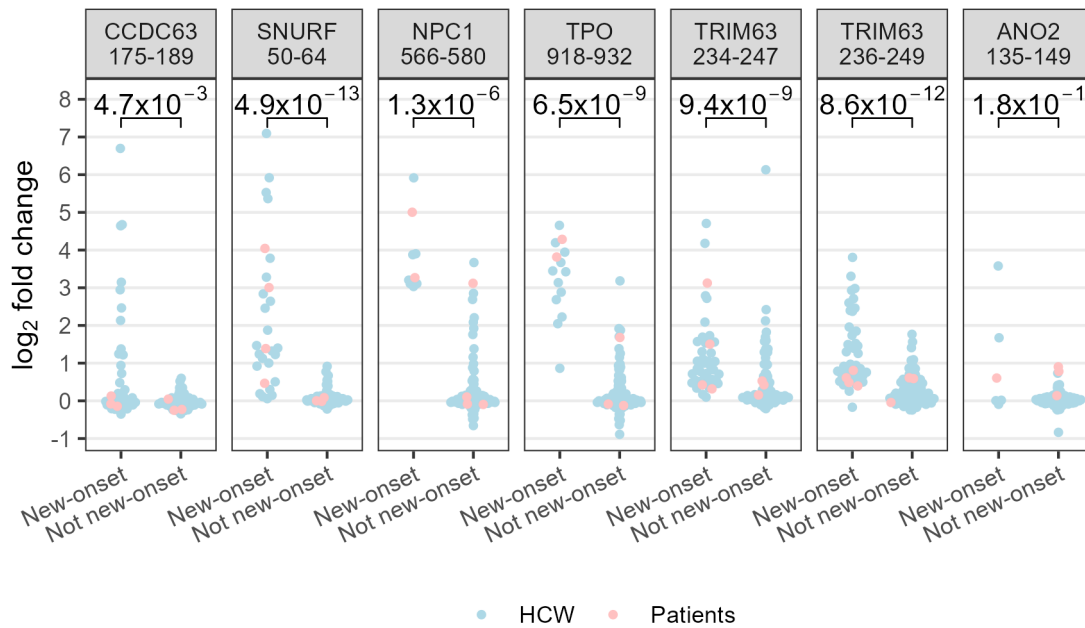

### Supplementary Figure 6 | Autoantibodies against the main epitopes in individuals with vs. without the respective new-onset autoantibody.

Points correspond to individuals. Categories on the x-axis indicate the prior classification of individuals' autoantibody trajectories towards the protein fragment corresponding to the peptide indicated in the panel titles. Levels on the y-axis correspond to the peptide indicated in the panel titles. Brackets indicate *q*-values from two-sided Mann-Whitney *U* tests with Benjamini-Hochberg correction.

**a**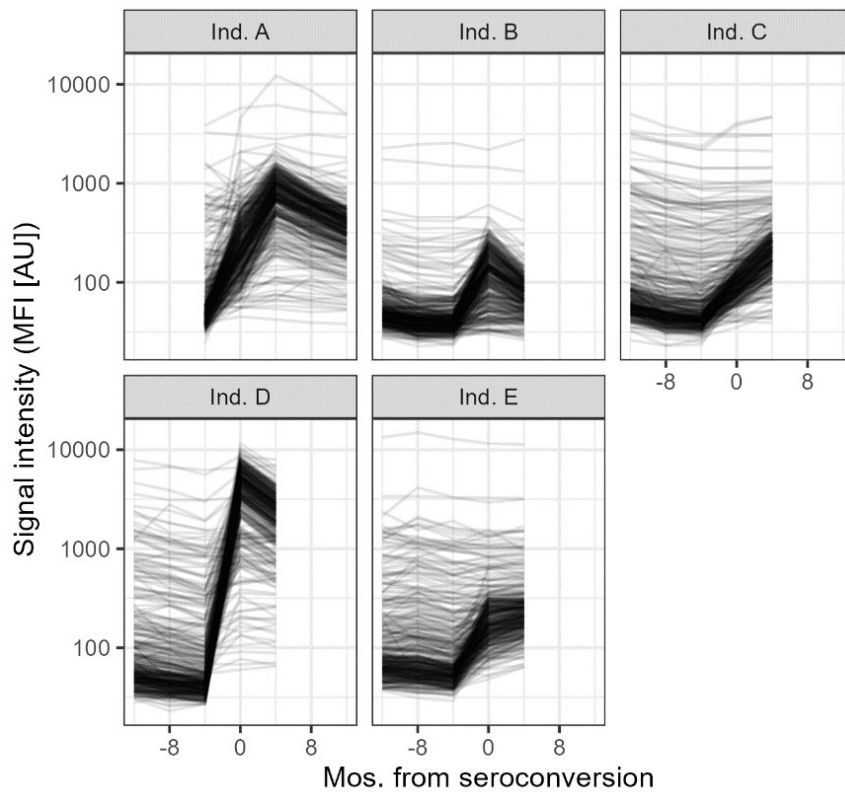**b**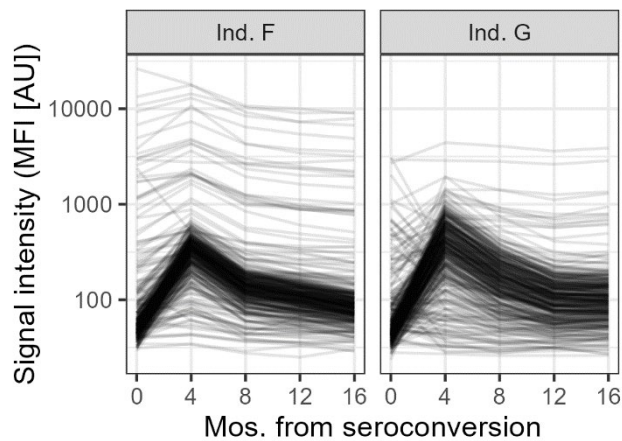

**Supplementary Figure 7 | Individuals with deviating global autoantibody patterns. a** Autoantibody line plots of the 5 individuals with high fold change at seroconversion across most autoantibodies. These individuals were identified using PCA and excluded from PAM clustering. **b** Autoantibody line plots of the 2 individuals with high fold change across most autoantibodies 4 months after seroconversion. These individuals were identified using PCA and excluded from MNL classification.
